# Supplementary figures and images for: Distribution and Diversity of Cytochrome P450 Monooxygenases in the Fungal Class Tremellomycetes
Source: MDPI journal article supplement (doi:10.3390/ijms20122889), 2019-06-13

**Taxonomy**

- CYP51
- CYP61
- CYP505
- CYP5139
- CYP5215
- CYP5216

0.1

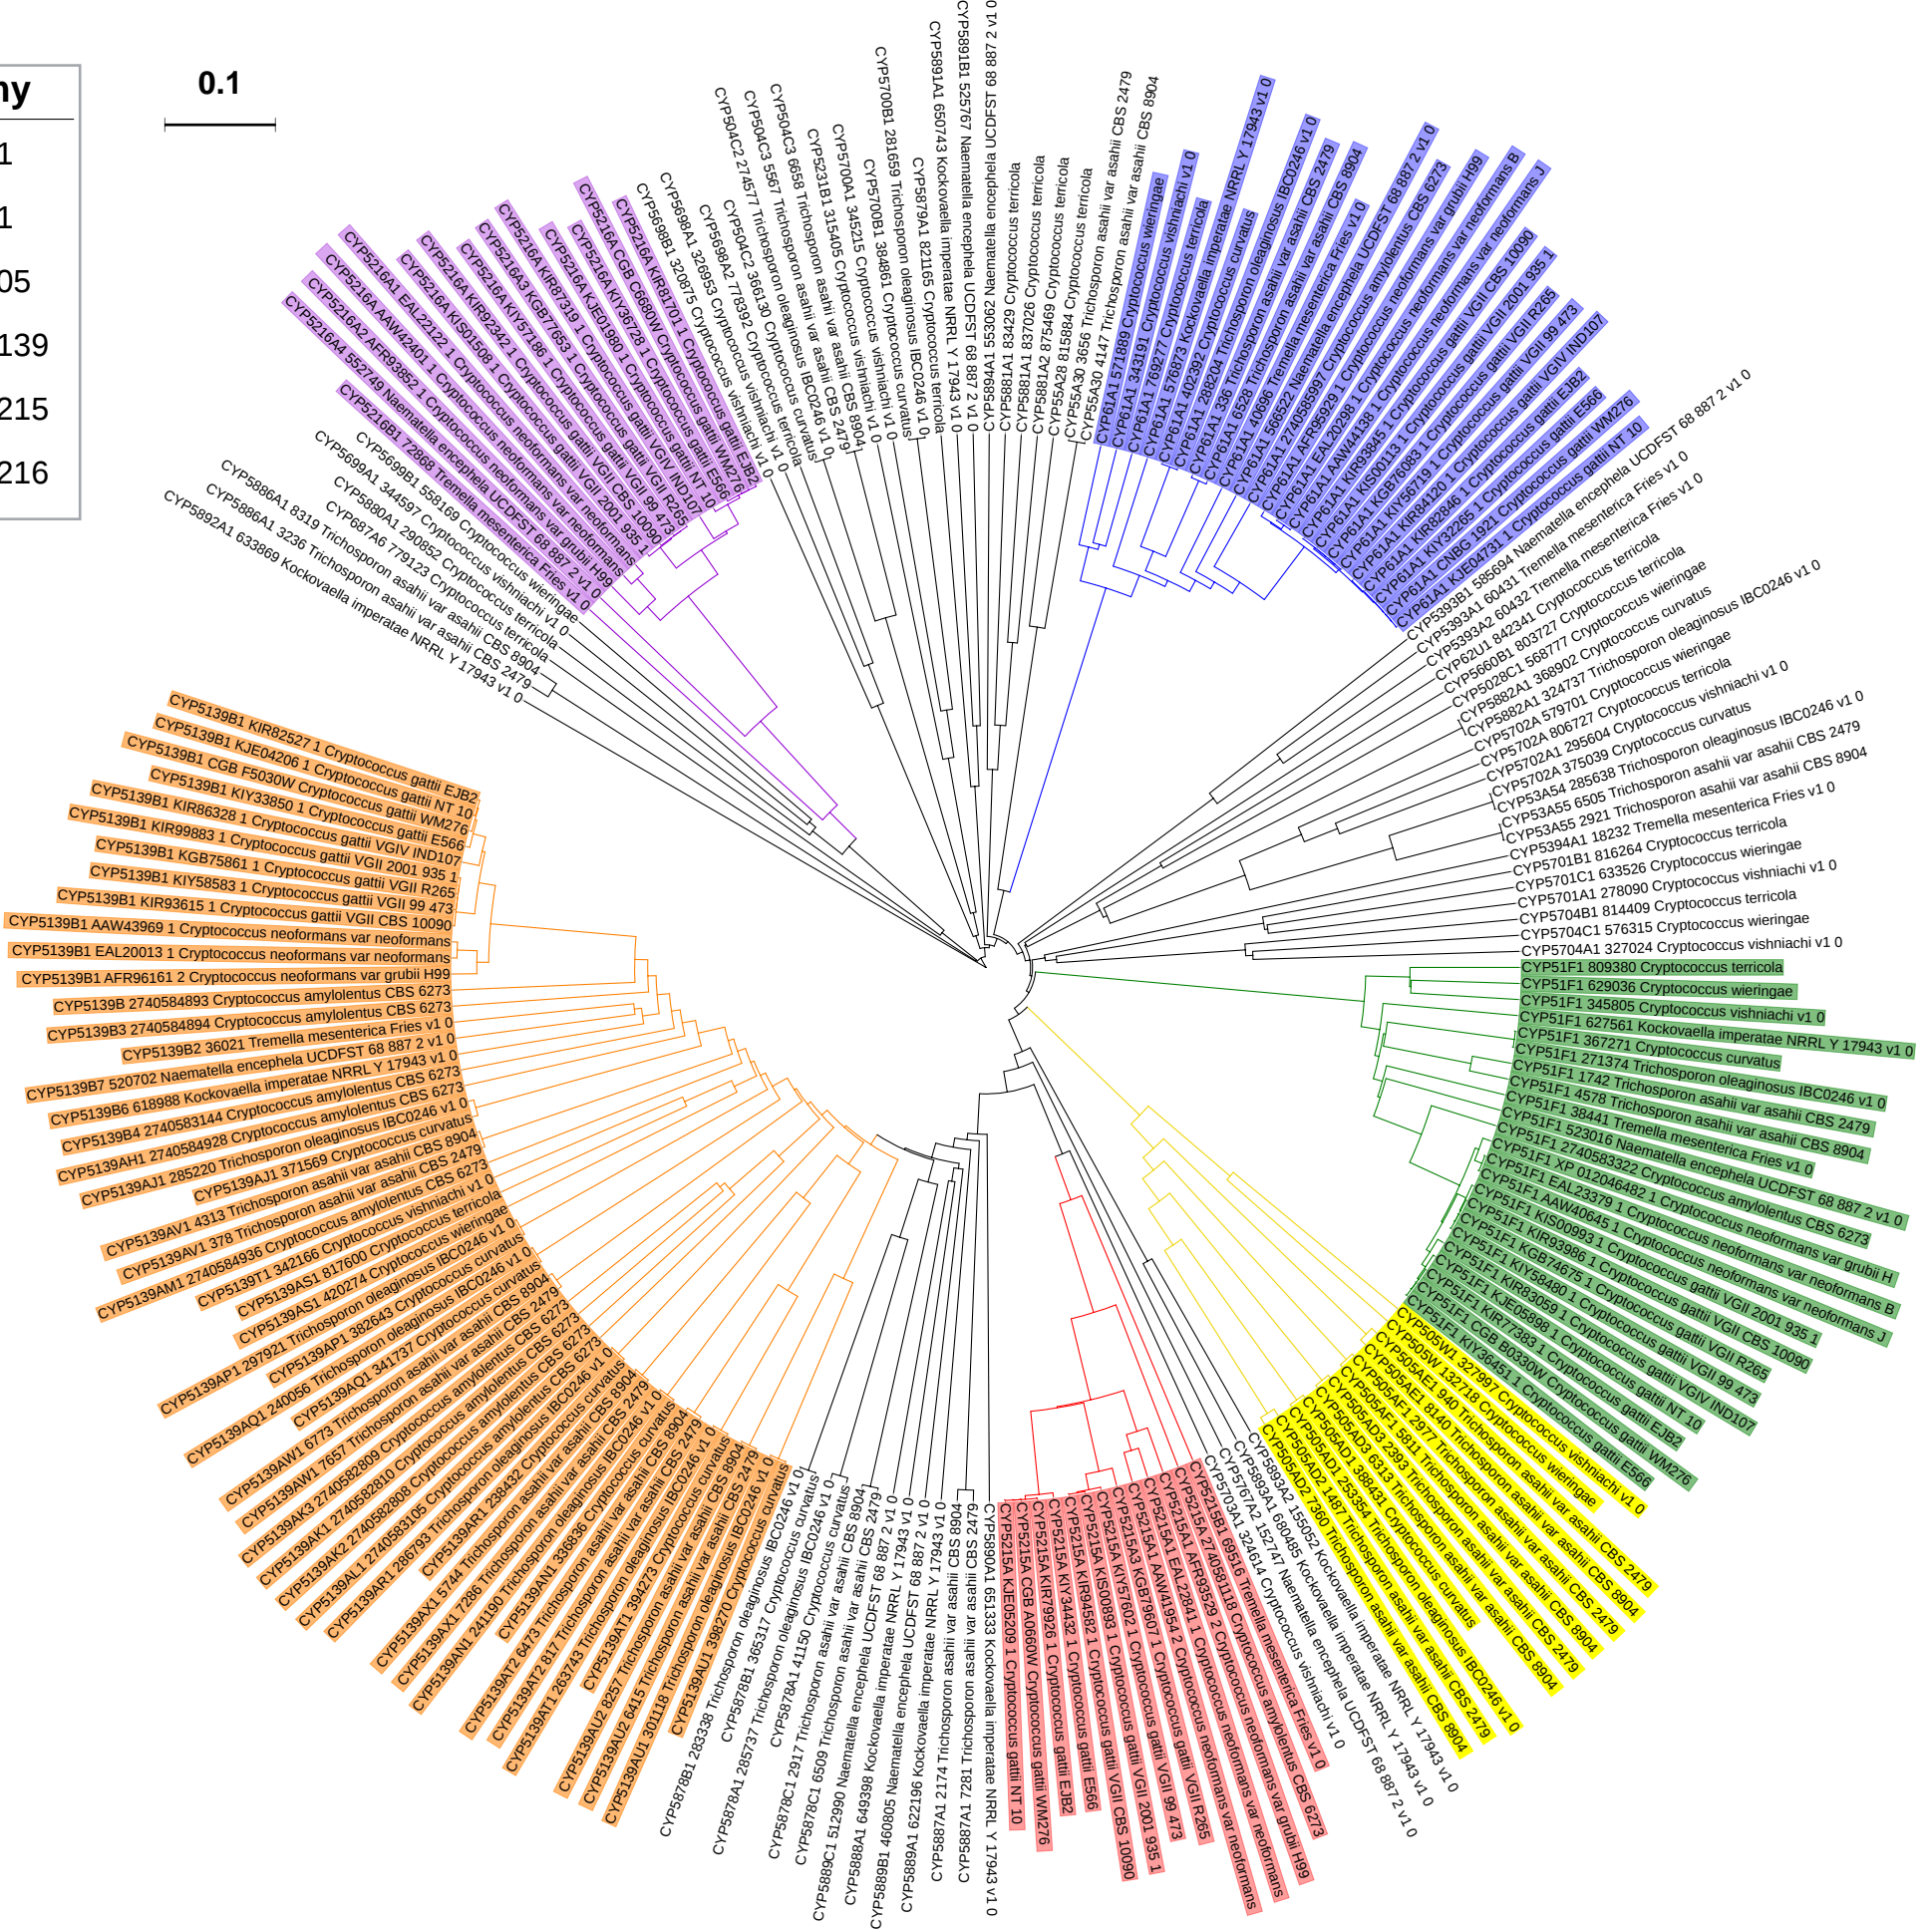

Supplement: s1 [file s1]
